# Supplementary material
Source: PubMed Central journal article supplement (PMC6715850)
Supplement: AEM.01271-19-s0001.pdf [file AEM.01271-19-s0001.pdf]

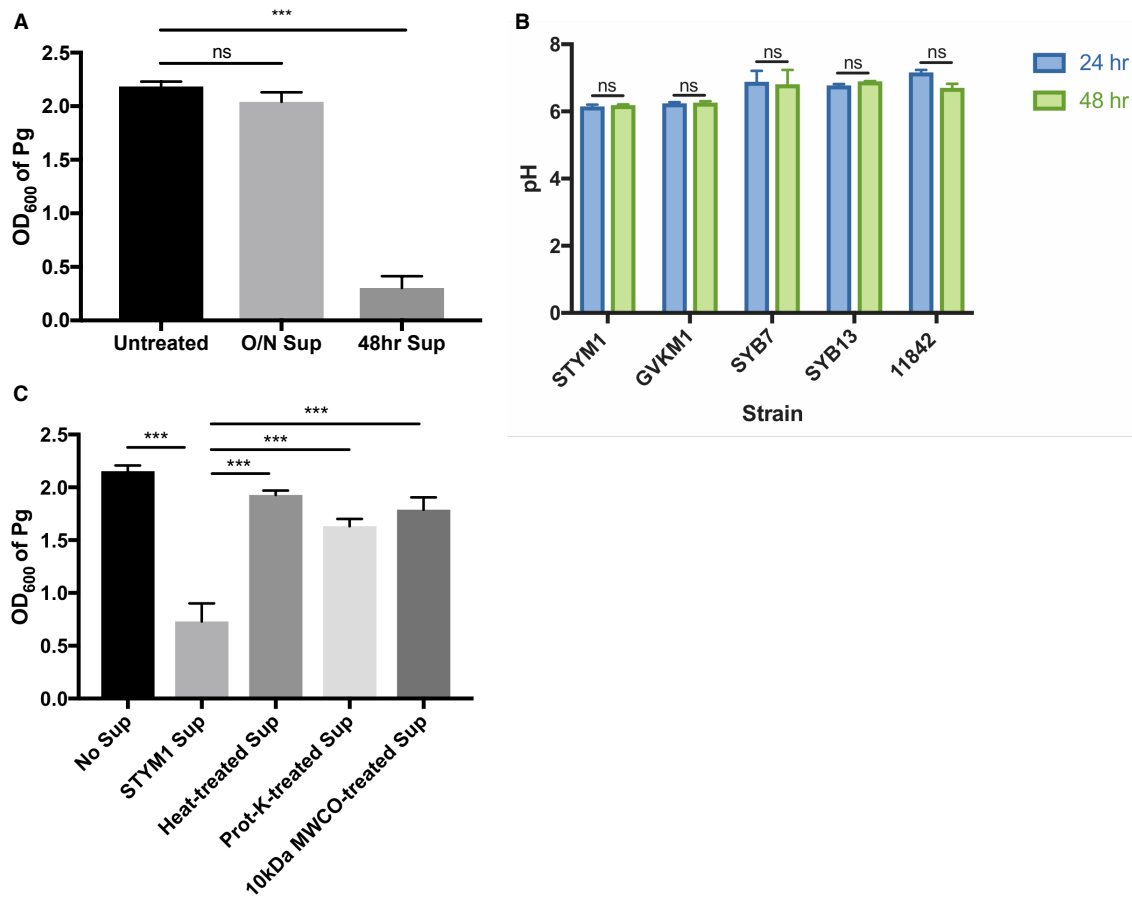

**Figure S1. 48 hour supernatant from STYM1 contains inhibitory protein.** A.) *P. gingivalis* end point growth after two days is shown with or without the addition of overnight or 48-hour supernatants from the STYM1 strain grown in BHI. Data represent the mean of three independent experiments and error bars represent one standard error about the mean. Statistical Significance was determined by One-way ANOVA (\*\*\*)  $p < 0.001$ . B.) Shown is the pH of supernatant following the growth of the indicated *L. delbrueckii* strain after either 24 or 48 hrs. Data represent the mean of three independent experiments and error bars represent standard error. Statistical significance was determined by a two-way RM ANOVA (ns, not significant). C.) *P. gingivalis* end point growth after two days is shown with STYM1 supernatant or with STYM1 supernatant treated with either heat, proteinase K, or passage through a MWCO-filter. Data represent the mean of three independent experiments and error bars represent one standard

error about the mean. Statistical significance was determined by One-way ANOVA (\*\*\*)  
p<0.001).

**A**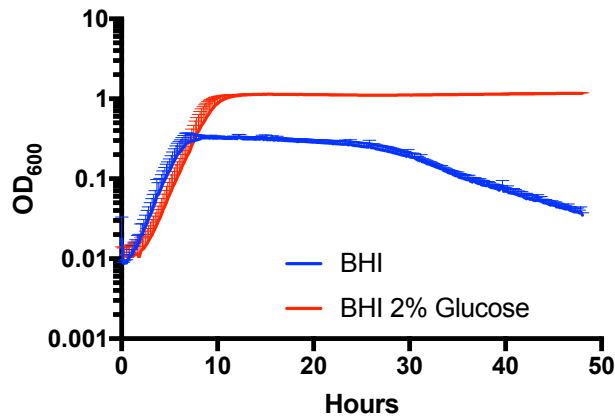**B**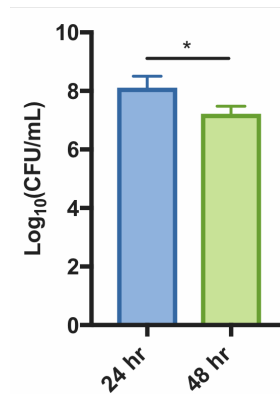

**Figure S2. STYM1 undergoes autolysis in late stationary phase due to carbon starvation.**

A.) Growth curves of the STYM1 strain grown in either BHI or BHI supplemented with 2% glucose under anaerobic conditions. The growth curves represent the average of three independent experiments. Error bars represent the standard error. B.) Shown are the CFU/mL of the STYM1 strain at 24 hr and 48 hr of incubation in BHI medium. Data represent the average of three independent experiments and error bars represent the standard error about the mean. Statistical significance was determined by a student's t-test (\*,  $p < 0.05$ ).

**Table S1.** Proteins identified by mass spectrometry in 70kDa band of fraction 9 from gel filtration. Unique and total refer to the number of unique and total peptides identified for a given protein. The calculated molecular weight is also indicated.

| Unique | Total | Protein                                                                | MWT(kDa) |
|--------|-------|------------------------------------------------------------------------|----------|
| 59     | 260   | Glutamine-fructose-6-phosphate aminotransferase                        | 65.68    |
| 54     | 128   | LBDND_1487 Pyruvate Oxidase                                            | 67.63    |
| 48     | 239   | LBND_0761 Pyruvate Kinase                                              | 62.99    |
| 48     | 159   | Phosphoenolpyruvate-protein phosphotransferase                         | 63.04    |
| 47     | 130   | Molecular Chaperone DnaK                                               | 66.02    |
| 43     | 162   | CTP Synthetase                                                         | 60.75    |
| 39     | 88    | LDBND_1876 Oligopeptidase F, Metallopeptidase, MEROPS family           | 68.22    |
| 38     | 43    | Preprotein translocase SecA                                            | 91.68    |
| 33     | 41    | Threonine tRNA ligase                                                  | 72.88    |
| 30     | 72    | LDBND_0713 Trigger Factor                                              | 48.93    |
| 27     | 30    | LDBND_1663 alpha-phosphoglucomutase                                    | 63.52    |
| 26     | 26    | Aspartate tRNA ligase                                                  | 69.43    |
| 25     | 44    | Proline tRNA ligase                                                    | 62.71    |
| 25     | 35    | Asparagine synthetase B                                                | 75.52    |
| 24     | 33    | Acylaminoacylpeptidase                                                 | 73.92    |
| 22     | 22    | LDBND_1525 60kDA Chaperonin groEL                                      | 57.29    |
| 22     | 22    | LDBND_1569 1-deoxy-dxylulose-5-phosphate synthase 2                    | 63.59    |
| 21     | 21    | LDBND_1386 Xaa-Pro dipeptidase                                         | 88.36    |
| 20     | 23    | LDBND_0509 Multicopper Oxidase                                         | 61.14    |
| 20     | 21    | LDBND_0814 GTP pyrophosphokinase                                       | 84.9     |
| 18     | 18    | GMP synthetase                                                         | 57.34    |
| 17     | 23    | LDBND_0712 Translation elongation factor tu                            | 43.33    |
| 17     | 17    | Mucus-binding Protein                                                  | 116.15   |
| 17     | 17    | Lysine tRNA ligase                                                     | 58.31    |
| 16     | 16    | LDBND_0412 Glutamyl-tRNA amidotransferase subunit A                    | 51.79    |
| 16     | 16    | Arginine tRNA ligase                                                   | 64.13    |
| 14     | 14    | ATP syntase subunit beta                                               | 52.12    |
| 14     | 14    | Serine tRNA ligase                                                     | 49.21    |
| 13     | 14    | ATP-dependent Clp protease ATP-binding subunit                         | 77.01    |
| 13     | 13    | LDBND_1328 dihydroxyacetone kinase related enzyme                      | 59.49    |
| 11     | 11    | Clp Protease ClpE                                                      | 81.7     |
| 11     | 11    | LDBND_0571 Glyceraldehyde-3-phosphate dehydrogenase                    | 36.56    |
| 10     | 10    | elongation factor G                                                    | 76.51    |
| 10     | 10    | LDBND_2052 tRNA uridine-5-carboxymethylaminomethyl modification enzyme | 70.48    |
| 9      | 9     | Acetyl-CoA carboxylase biotin carboxylase                              | 50.89    |
| 9      | 9     | LBDND_0572 Phosphoglycerate kinase                                     | 42.7     |
| 9      | 9     | LBDND_2030 Pyruvate/2-oxoglutarate dehydrogenase complex               | 48.46    |
| 9      | 9     | Alanine tRNA ligase                                                    | 97.42    |

|   |   |                                                                                       |        |
|---|---|---------------------------------------------------------------------------------------|--------|
| 9 | 9 | LDBND_1705 6-phospho-alpha glucosidase                                                | 50.07  |
| 7 | 8 | guanosine monophosphate reductase                                                     | 40.1   |
| 7 | 8 | LDBND_1752 Oxidoreductase                                                             | 27.91  |
| 7 | 7 | LDBND_1877 L-lactate oxidase                                                          | 44.06  |
| 7 | 7 | LDBND_1006 Carbamoyl-phosphate synthase large subunit                                 | 118.13 |
| 7 | 7 | ATP synthase subunit alpha                                                            | 54.63  |
| 6 | 6 | LDBND_0970 HSDM-Type I modification subunit                                           | 60.2   |
| 6 | 6 | LDBND_1769 Methyltransferase FkbM family                                              | 62.32  |
| 6 | 6 | UDP-N-acetylmuramoyl-l-alanyl-D-glutamate-2,6-diaminopimelate ligase                  | 56.78  |
| 6 | 6 | LDBND_0069 Ribonucleotide reductase alpha                                             | 81.93  |
| 5 | 5 | LDBND_0413 apartyl/glutamyl-rRNA amidotransferase                                     | 53.54  |
| 5 | 5 | LDBND_1489 Pyruvate, water dikinase                                                   | 89.57  |
| 5 | 5 | LDBND_0696 Rnase J family beta-CASP ribonuclease                                      | 61.68  |
| 5 | 5 | UMP Kinase                                                                            | 25.88  |
| 4 | 5 | Succinate-semialdehyde dehydrogenase                                                  | 50.23  |
| 4 | 5 | Bifunctional N-Acetylglucosamine-1-phosphate uridyltransferase                        | 49.83  |
| 4 | 5 | LDBND_1287 Elongation factor Ts                                                       | 37.36  |
| 4 | 4 | LDBND_1925 FAD/FMN-containing dehydrogenase                                           | 51.78  |
| 4 | 4 | LDBND_0778 Transcriptional regulator LysR family                                      | 35.65  |
| 4 | 4 | Alpha-glycosidase                                                                     | 64.97  |
| 4 | 4 | LDBND_0588 Phosphoglucosamine mutase                                                  | 48.83  |
| 4 | 4 | ribonucleoside-triphosphate reductase                                                 | 83.59  |
| 4 | 4 | PTS sucrose Transporter IIABC                                                         | 68.274 |
| 4 | 4 | LDBND_0088 Glucokinase                                                                | 32.56  |
| 3 | 3 | ATP-dependent Clp Protease ClpX                                                       | 46.39  |
| 3 | 3 | LDBND_1886 Fusion of IIA, IIB, and IIC component mannitol fructose phosphotransferase | 69.59  |
| 3 | 3 | LDBND_0208 Oligopeptidase O2                                                          | 71.92  |
| 3 | 3 | Class II fumarate hydratase                                                           | 50.87  |
| 3 | 3 | Isoleucine tRNA ligase                                                                | 105.94 |
| 3 | 3 | LDBND_1990 Hypothetical protein LDBND_1990(probable restriction endonuclease)         | 100.87 |
| 3 | 3 | LDBND_1309 DNA/RNA helicase                                                           | 133.07 |
| 3 | 3 | LDBND_1999 Cation Transporting P-type ATPase                                          | 59.06  |
| 3 | 3 | LDBND_0773 SSU ribosomal protein S1P                                                  | 44.23  |
| 2 | 3 | Hypothetical protein LDBND_0981                                                       | 68.38  |
| 2 | 2 | DNA directed RNA polymerase beta                                                      | 135.4  |
| 2 | 2 | Cell Division Protein FtsH                                                            | 76.625 |
| 2 | 2 | Acetyl-CoA carboxylase biotin carboxyl carrier protein                                | 169.43 |
| 2 | 2 | LDBND_1408 Glutamine synthetase                                                       | 50.16  |
| 2 | 2 | Cytochrome C                                                                          | 49.3   |
| 2 | 2 | LDBND_1991 DNA recognition and methylase subunit Mod                                  | 62.13  |
| 2 | 2 | LDBND_1143 Putative Phosphotransferase                                                | 32.1   |

|   |   |                                                    |        |
|---|---|----------------------------------------------------|--------|
| 2 | 2 | D-Ala-D-Ala ligase A                               | 40.14  |
| 2 | 2 | LBDND_0477 Phosphoketolase                         | 90.86  |
| 2 | 2 | LBDND_0080 Butyryl-CoA dehydrogenase               | 57.39  |
| 2 | 2 | Xaa-Pro dipeptidase                                | 41.05  |
| 2 | 2 | LBDND_0269 Predicted ATP-grasp enzyme              | 48.85  |
| 1 | 1 | MutS Mismatch repair                               | 87.46  |
| 1 | 1 | LBDND_0789 Agrininosuccinate lyase                 | 51.54  |
| 1 | 1 | Nif3-like dinuclear metal center hexameric protein | 29.2   |
| 1 | 1 | LBDND_1445 DNA pol I                               | 99.9   |
| 1 | 1 | LBDND_0312 Ribosome-associated heat shock protein  | 8.93   |
| 1 | 1 | LBDND_0823 Acyl carrier protein                    | 9.12   |
| 1 | 1 | LBDND_1931 Aminopeptidase N                        | 95.27  |
| 1 | 1 | Hypothetical protein                               | 29.81  |
| 1 | 1 | Hypothetical protein LDBND_2048                    | 21.57  |
| 1 | 1 | LBDND_0728 ABC Transporter ATP Binding Protein     | 38.373 |
| 1 | 1 | LBDND_1872 ATPase component of ABC transporter     | 57.73  |

---
